# Supplementary material for: In Silico Analysis of Putative Paralytic Shellfish Poisoning Toxins Export Proteins in Cyanobacteria
Source: PubMed Central journal article supplement (PMC3574068; doi:10.1371/journal.pone.0055664), 2013-02-15
Supplement: pone.0055664.s005.pdf [file pone.0055664.s005.pdf]

ProtTest - 2.4 Selection of models of protein evolution  
(c) 2004 Federico Abascal, Rafael Zardoya, David Posada  
(FA, DP) Facultad de Biología, Universidad de Vigo, 36200 Vigo, Spain  
(RZ) Museo Nacional de Ciencias Naturales, 28006 Madrid, Spain  
Contact: fedeabascal@yahoo.es, dposada@uvigo.es  
-----

Wed Nov 14 19:18:06 CET 2012  
OS = Linux (2.6.34.10-0.6-desktop)

ProtTest options  
-----

Alignment file..... :  
/srv/www/vhosts/darwin.uvigo.es/serving/prottest/tmp/alignment\_22034  
Tree..... : BioNJ  
StrategyMode..... : Slow (optimize branch lengths, model & topology)  
Tree search..... : NNI  
Candidate models..... :  
Matrices..... : JTT LG DCMut MtREV MtMam MtArt Dayhoff WAG RtREV  
CpREV Blosum62 VT HIVb HIVw  
Distributions..... : +I +G +I+G  
Number of rate categ... : 4  
Observed frequencies... : true  
Statistical framework  
Sort models according to....: AIC  
Sample size..... : 0.0 (not calculated yet)  
sampleSizeMode..... : Total number of characters (alignment length)  
Other options:  
Display best tree in ASCII..: false  
Display best tree in Newick.: true  
Verbose..... : true

\*\*\*\*\*

Reading alignment...  
Sequence #1: SxtF\_D9  
Sequence #2: SxtF\_T3  
Sequence #3: SxtF\_CRJ1  
Sequence #4: SxtF\_CRA3  
Sequence #5: SxtF\_CR01  
Sequence #6: SxtM1\_LW  
Sequence #7: SxtM2\_LW  
Sequence #8: SxtM3\_LW  
Sequence #9: SxtM\_D9  
Sequence #10: SxtM\_T3  
Sequence #11: SxtM\_AphaN  
Sequence #12: SxtM\_AC\_AW  
Sequence #13: SxtM\_CR\_J1  
Sequence #14: SxtM\_CR03  
Sequence #15: SxtM\_CR01  
Sequence #16: NorM\_Nosto  
Sequence #17: NorM\_VCRC3  
Alignment contains 17 sequences of length 449

\*\*\*\*\*  
Date : Wed Nov 14 20:10:15 CET 2012  
Runtime: 0h:52:09

\*\*\*\*\*  
Best model according to AIC: JTT+G+F

\*\*\*\*\*

| Model       | deltaAIC* | AIC     | AICw | -lnL     |
|-------------|-----------|---------|------|----------|
| JTT+G+F     | 0.00      | 9877.95 | 0.53 | -4887.98 |
| CpREV+G+F   | 1.96      | 9879.91 | 0.20 | -4888.96 |
| JTT+I+G+F   | 2.00      | 9879.95 | 0.20 | -4887.98 |
| CpREV+I+G+F | 3.96      | 9881.91 | 0.07 | -4888.96 |
| JTT+I+F     | 37.04     | 9914.99 | 0.00 | -4906.50 |
| WAG+G+F     | 42.88     | 9920.84 | 0.00 | -4909.42 |
| CpREV+I+F   | 44.88     | 9922.83 | 0.00 | -4910.42 |
| WAG+I+G+F   | 44.88     | 9922.84 | 0.00 | -4909.42 |
| JTT+F       | 47.45     | 9925.40 | 0.00 | -4912.70 |
| CpREV+F     | 52.71     | 9930.67 | 0.00 | -4915.33 |
| LG+G+F      | 66.45     | 9944.41 | 0.00 | -4921.20 |
| HIVb+G+F    | 68.03     | 9945.98 | 0.00 | -4921.99 |
| LG+I+G+F    | 68.45     | 9946.41 | 0.00 | -4921.20 |
| HIVb+I+G+F  | 70.03     | 9947.98 | 0.00 | -4921.99 |
| WAG+I+F     | 74.83     | 9952.78 | 0.00 | -4925.39 |
| WAG+F       | 82.83     | 9960.79 | 0.00 | -4930.39 |
| MtREV+G+F   | 86.64     | 9964.59 | 0.00 | -4931.30 |
| MtREV+I+G+F | 88.64     | 9966.59 | 0.00 | -4931.29 |
| Dayhoff+G+F | 89.63     | 9967.59 | 0.00 | -4932.79 |
| DCMut+G+F   | 90.20     | 9968.16 | 0.00 | -4933.08 |
